# Supplementary material for: In Vitro Cytotoxic Effect of Aqueous Extracts from Leaves and Rhizomes of the Seagrass Posidonia oceanica (L.) Delile on HepG2 Liver Cancer Cells: Focus on Autophagy and Apoptosis
Source: MDPI journal article supplement (doi:10.3390/biology12040616), 2023-04-18
Supplement: s1 [file s1]

Figure S1

Original images of the Western blots for Hsp60 and LC3

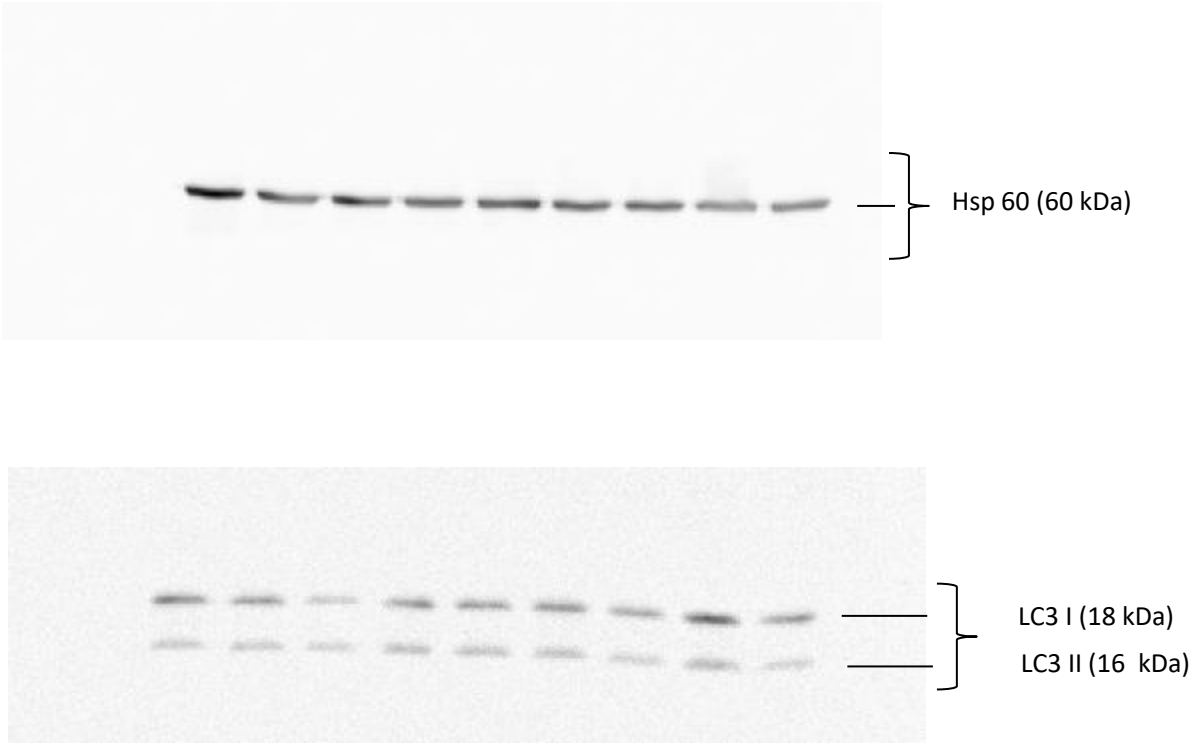

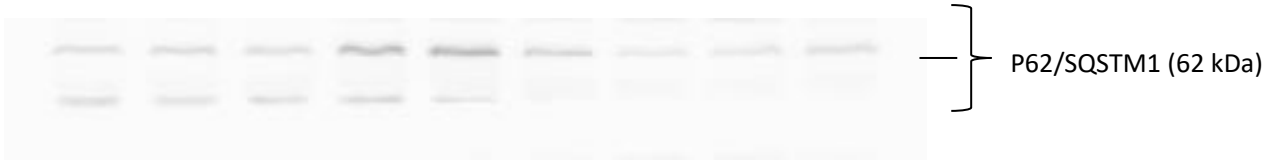

Image related to figure 10 of the manuscript (P62/SQSTM1)

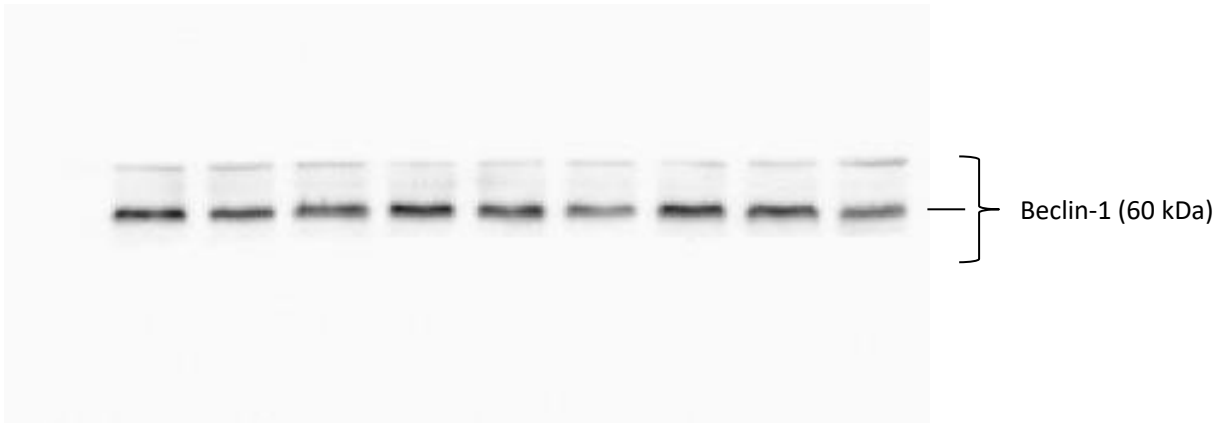

Images related to figure 10 of the manuscript (Beclin-1)

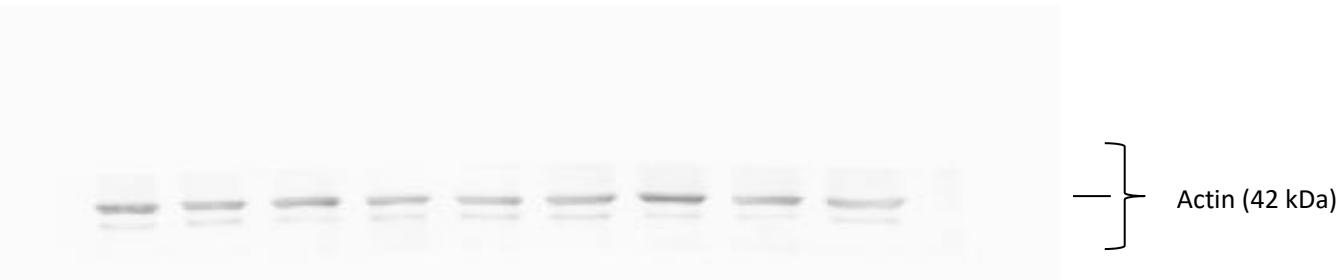

Images related to figure 10 of the manuscript (Actin)
